# Supplementary material for: Disparities in Telemedicine Success and Their Association With Adverse Outcomes in Patients With Thoracic Cancer During the COVID-19 Pandemic
Source: PubMed Central journal article supplement (PMC9264040; doi:10.1001/jamanetworkopen.2022.20543), 2022-07-07
Supplement: jamanetwopen-e2220543-s001.pdf [file jamanetwopen-e2220543-s001.pdf]

## Supplementary Online Content

Waseem N, Boulanger M, Yanek LR, Feliciano JL. Disparities in telemedicine success and their association with adverse outcomes in patients with thoracic cancer during the COVID-19 pandemic. *JAMA Netw Open*. 2022;5(7):e2220543. doi:10.1001/jamanetworkopen.2022.20543

**eFigure.** High-risk Zip Codes in East Baltimore

This supplementary material has been provided by the authors to give readers additional information about their work.

**eFigure.** High-risk Zip Codes in East Baltimore

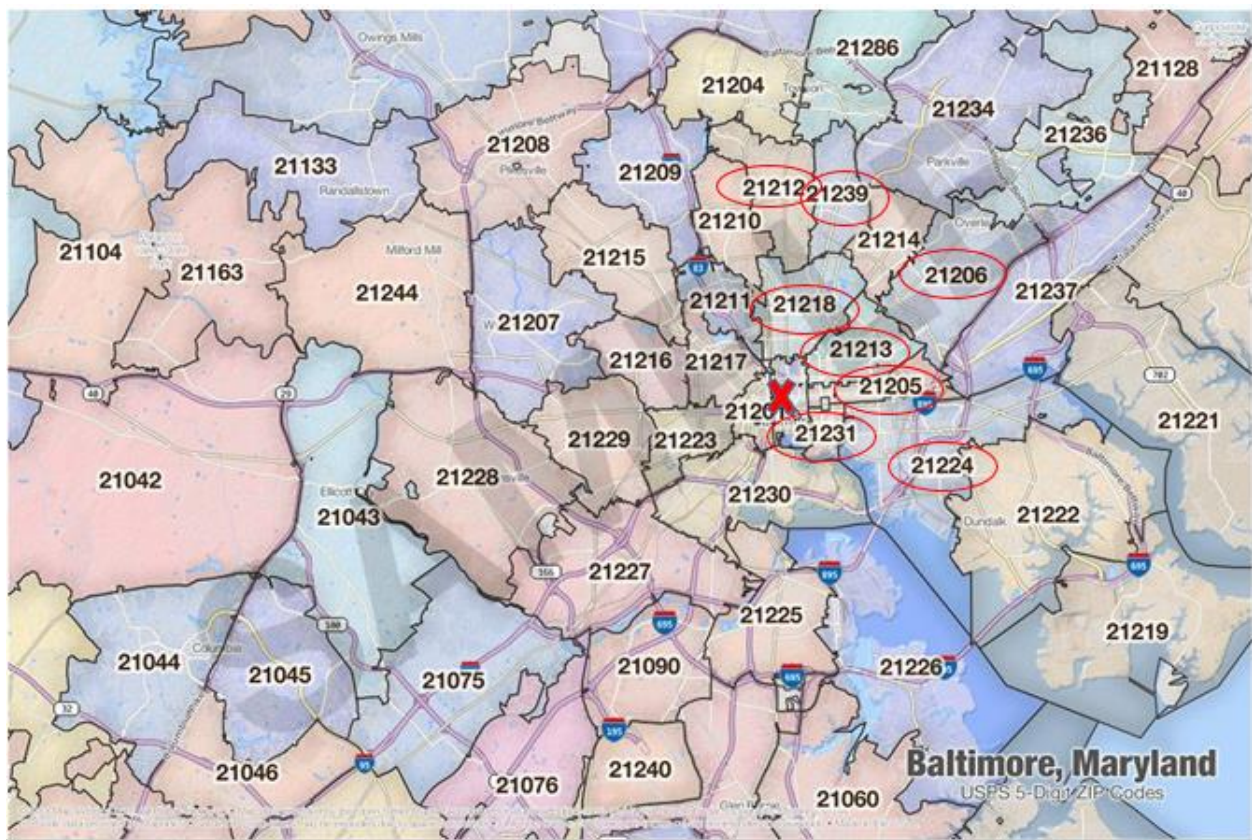

Zip codes including 21205, 21206, 21212, 21213, 21218, 21224, 21231, 21239. X is the approximate location of Johns Hopkins Hospital
